# Supplementary material for: Personalized disease-specific protein corona influences the therapeutic impact of graphene oxide
Source: Royal Society of Chemistry journal article supplement (doi:10.1039/c5nr00520e), 2015-01-01
Supplement: c5nr00520e1.pdf [file c5nr00520e1.pdf]

## Supporting Information

# Personalized, Disease-Specific Protein Corona Influences the Therapeutic Impact of Graphene Oxide

Mohammad Javad Hajipour<sup>a,b,c</sup>, Jamshid Raheb<sup>a\*</sup>, Omid Akhavan<sup>d</sup>, Sareh Arjmand<sup>e</sup>, Omid Mashinchian<sup>c</sup>, Masoud Rahman<sup>f</sup>, Mohammad Abdolahad<sup>g,h</sup>, Vahid Serpooshan<sup>i\*</sup>, Sophie Laurent<sup>j</sup>, and Morteza Mahmoudi<sup>c,i,k\*</sup>

<sup>a</sup>Department of Medical Biotechnology, National Institute of Genetic Engineering and Biotechnology (NIGEB), Tehran, Iran.

<sup>b</sup>The Persian Gulf Marine Biotechnology Research Center, Bushehr University of Medical Sciences, Bushehr, Iran.

<sup>c</sup>Department of Nanotechnology and Nanotechnology Research Center, Faculty of Pharmacy, Tehran University of Medical Sciences, Tehran, Iran.

<sup>d</sup>Department of Physics, Sharif University of Technology, P.O. Box 11155-9161, Tehran, Iran.

<sup>e</sup>Department of Clinical Biochemistry, Faculty of Medical Science, Tarbiat Modares University, Tehran, Iran.

<sup>f</sup>Department of Chemical Engineering and Materials Science, University of California Davis, Davis, CA 95616, USA

<sup>g</sup>Nano Electronic Center of Excellence, Thin Film and Nanoelectronic Lab, School of Electrical and Computer Eng, University of Tehran, Tehran, Iran, P.O. Box 14395/515, Tehran, Iran

<sup>h</sup>Nano Electronic Center of Excellence, Nano Bio Electronic Devices Lab, School of Electrical and Computer Eng, University of Tehran, Tehran, Iran, P.O. Box 14395/515, Tehran, Iran

<sup>i</sup>Cardiovascular Institute, Stanford University School of Medicine, Stanford, California, United States.

<sup>j</sup>Department of General, Organic and Biomedical Chemistry, NMR and Molecular Imaging Laboratory, University of Mons, 19 Avenue Maistriau, B-7000 Mons, Belgium.

<sup>k</sup>Division of Cardiovascular Medicine, Department of Medicine, Stanford University School of Medicine, Stanford, California, United States.

\*Address correspondence to: (JR) jamshid@nigeb.ac.ir, (VS) [vserp1@stanford.edu](mailto:vserp1@stanford.edu),  
(MM) Mahmoudi@stanford.edu

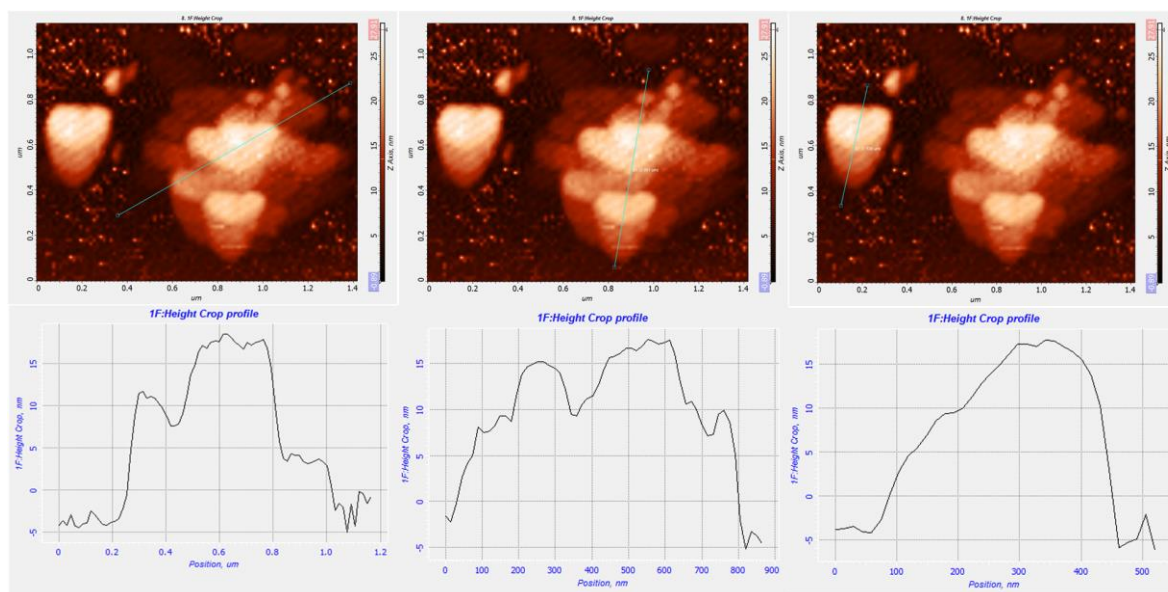

**Figure S1.** AFM images of hard corona coated CCGO sheets (5% plasma) obtained from diabetic patient (top panels) and their correspondence height profiles distribution (bottom panel).

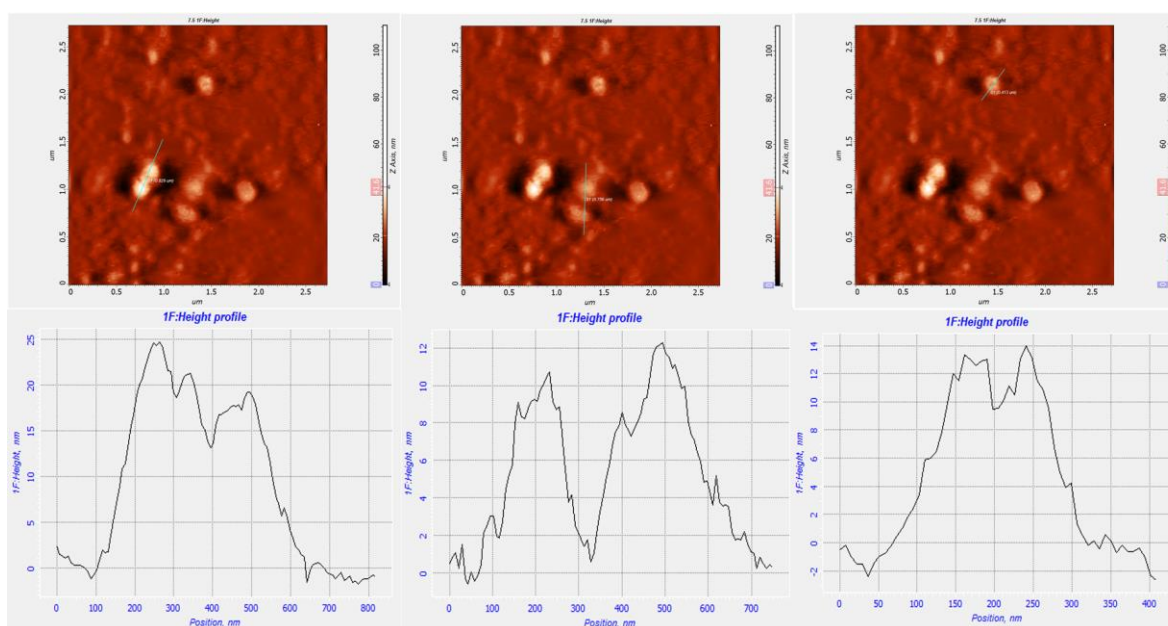

**Figure S2.** AFM images of hard corona coated CCGO sheets (5% plasma) obtained from hypofibrinogenemia patient (top panels) and their correspondence height profiles distribution (bottom panel).

**Healthy 5%, MCF-7**

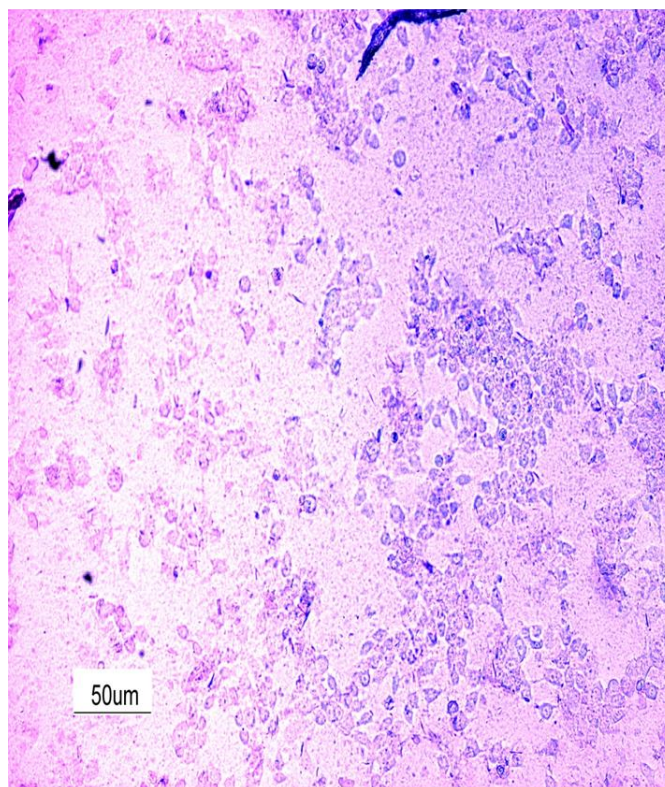

**Healthy 50%, MCF-7**

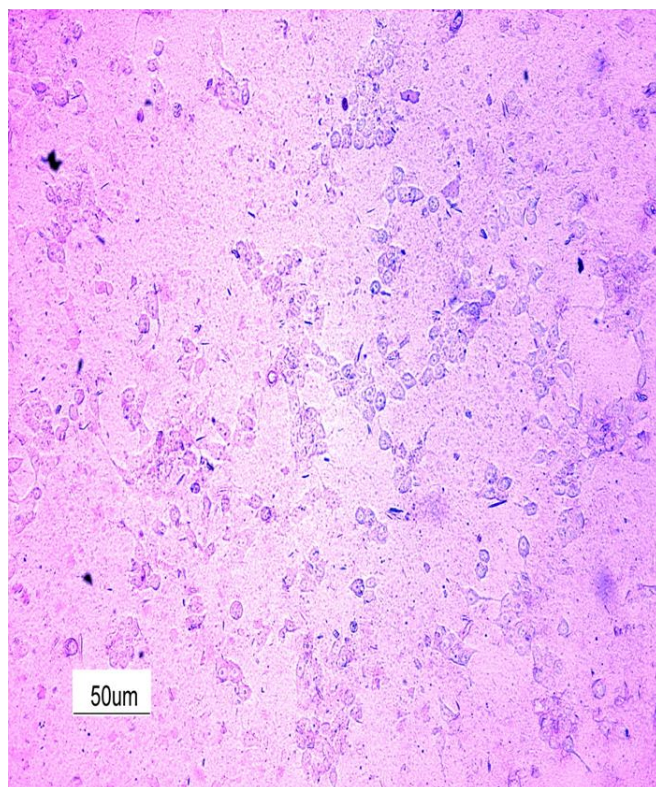

**Figure S-3 A).** Morphological states of MCF-7 cells after incubation (24 h) with corona coated CCGO obtained from healthy subjects (P 5% and P50%).



**Pregnancy 5%, MCF-7**

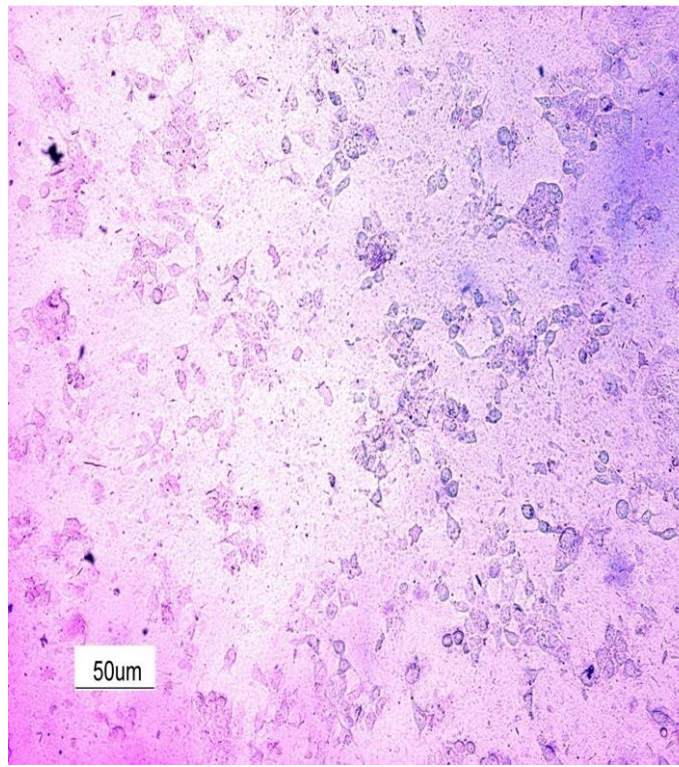

**Pregnancy 50%, MCF-7**

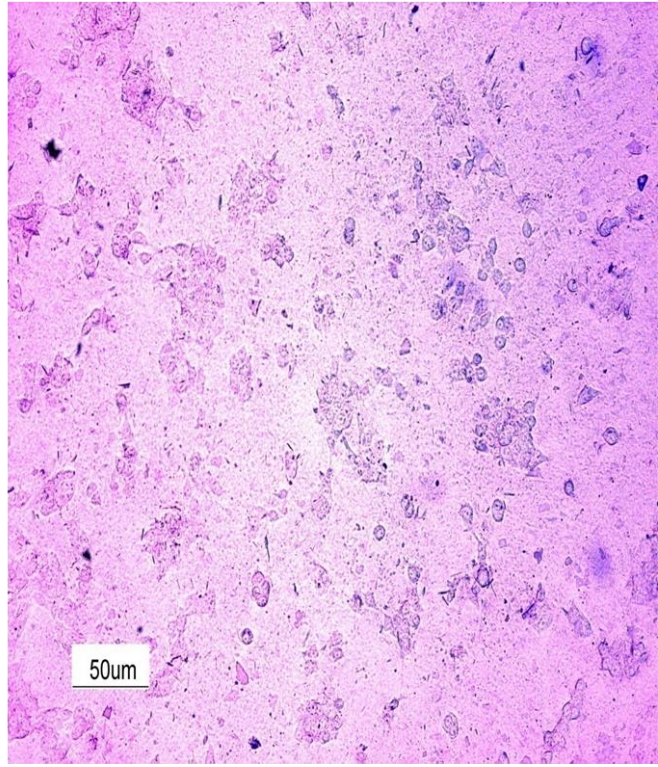

**Figure S-3 B).** Morphological states of MCF-7 cells after incubation (24 h) with corona coated CCGO obtained from pregnancy subjects (P 5% and P50%).



**Diabetes 5%, MCF-7**

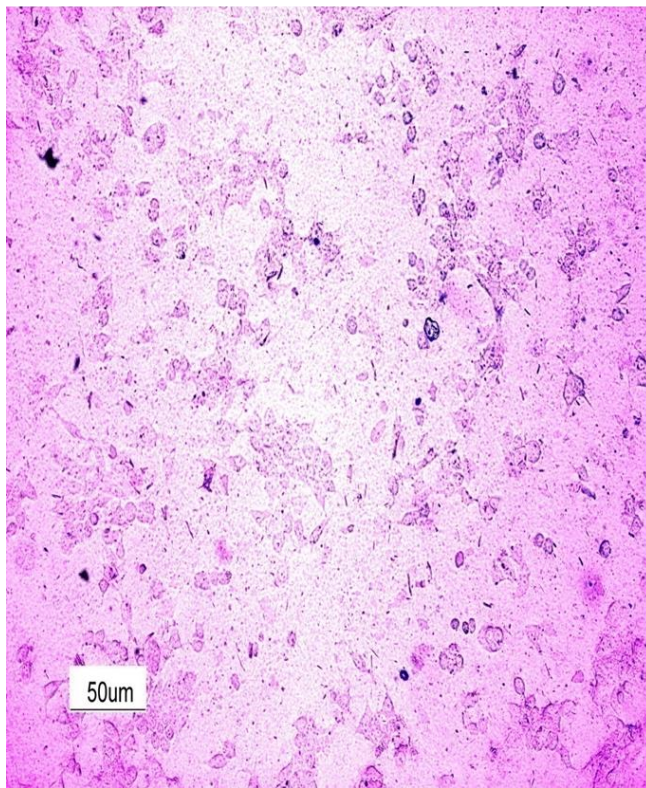

**Diabetes 50%, MCF-7**

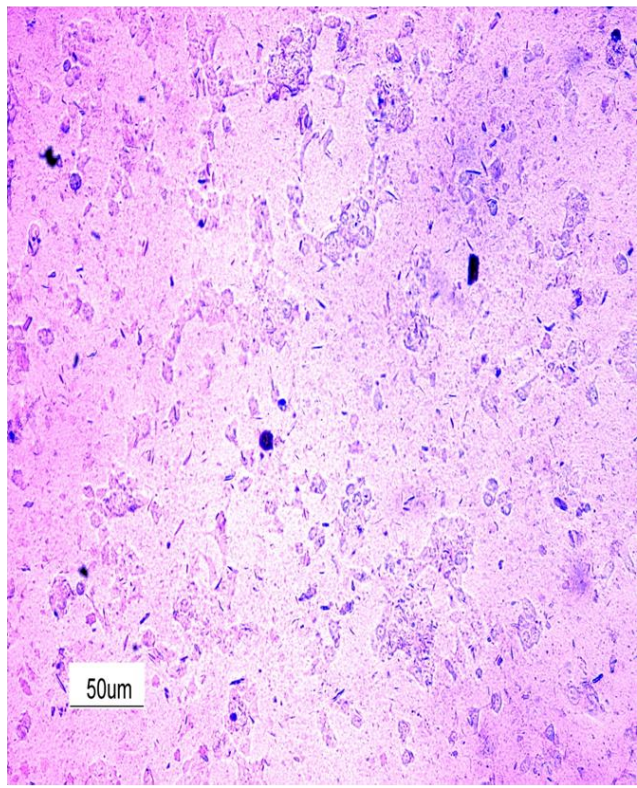

**Figure S-3 C).** Morphological states of MCF-7 cells after incubation (24 h) with corona coated CCGO obtained from diabetic patients (P 5% and P50%).



**Hypercholesterolemia 5%, MCF-7**

**Hypercholesterolemia 50%, MCF-7**

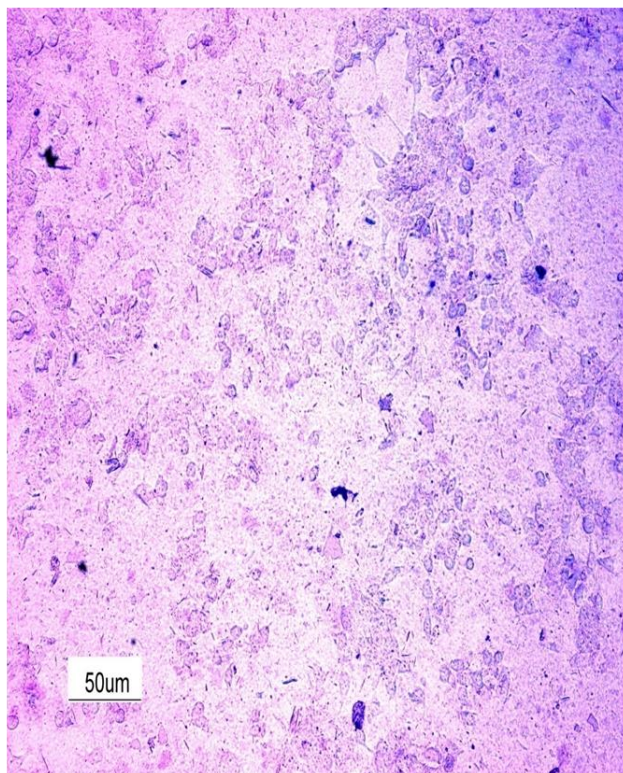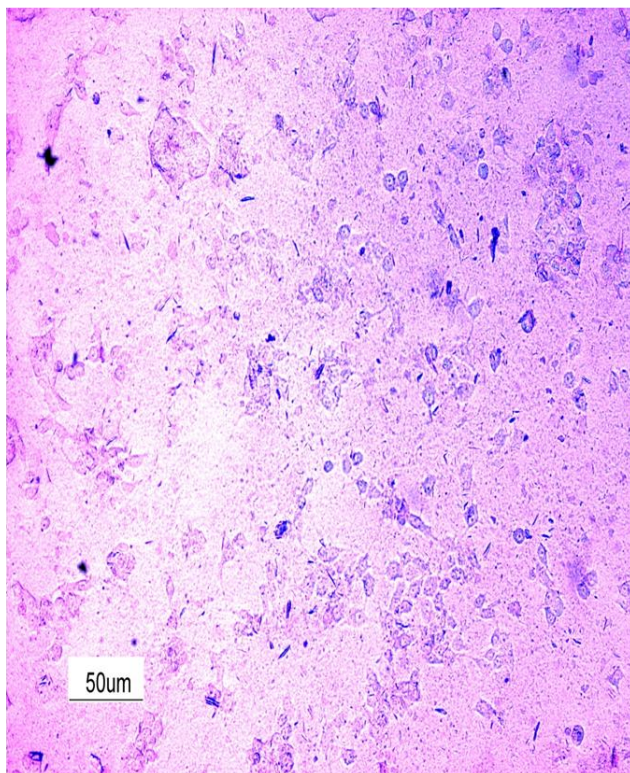

**Figure S-3 D).** Morphological states of MCF-7 cells after incubation (24 h) with corona coated CCGO obtained from hypercholesterolemia patients (P 5% and P50%).

**Rheumatism 5%, MCF-7**

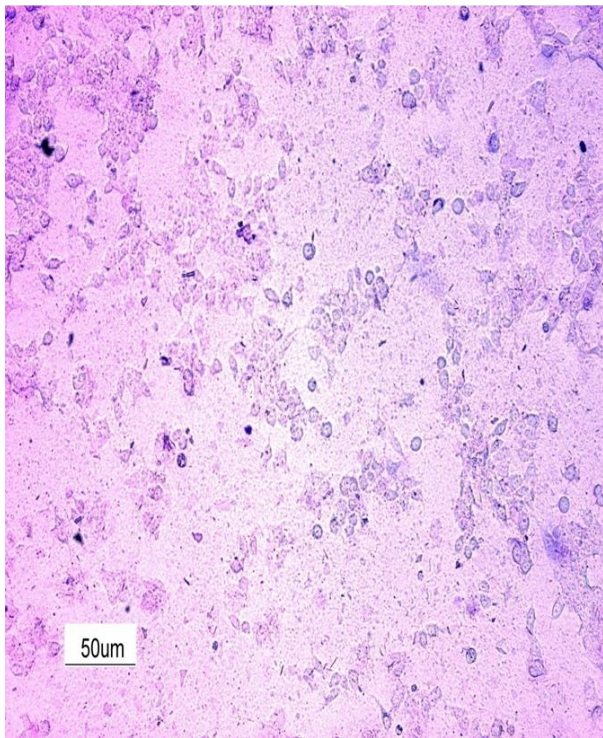

**Rheumatism 50%, MCF-7**

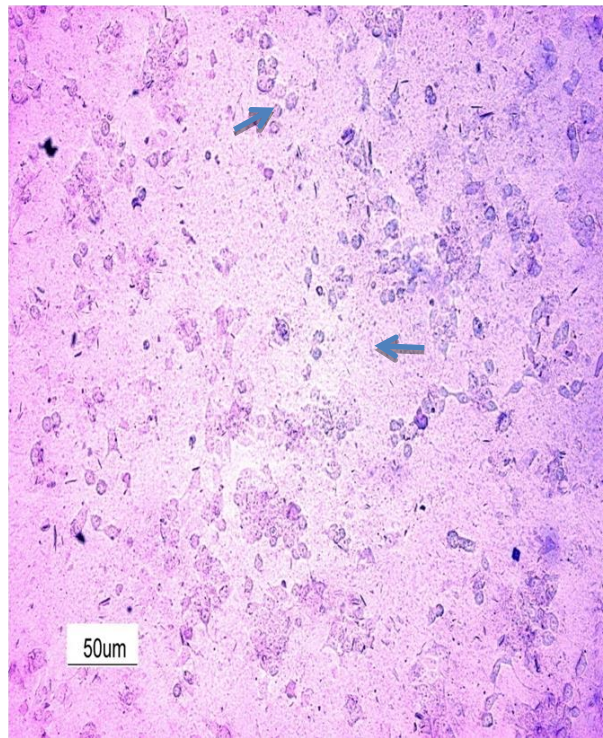

**Figure S-3 E).** Morphological states of MCF-7 cells after incubation (24 h) with corona coated CCGO obtained from rheumatism patients (P 5% and P50%).



**Thalassemia Minor 5%, MCF-7**

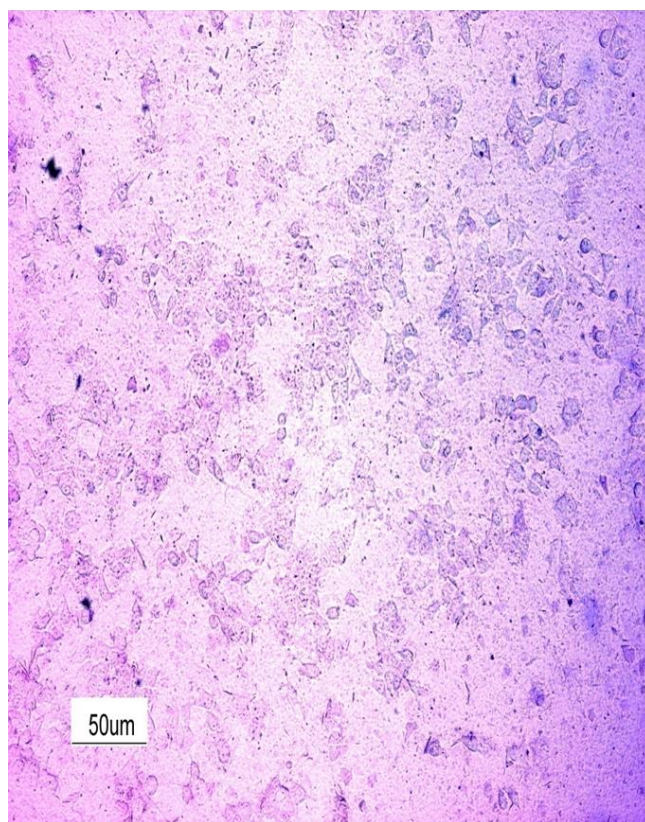

**Thalassemia Minor 50%, MCF-7**

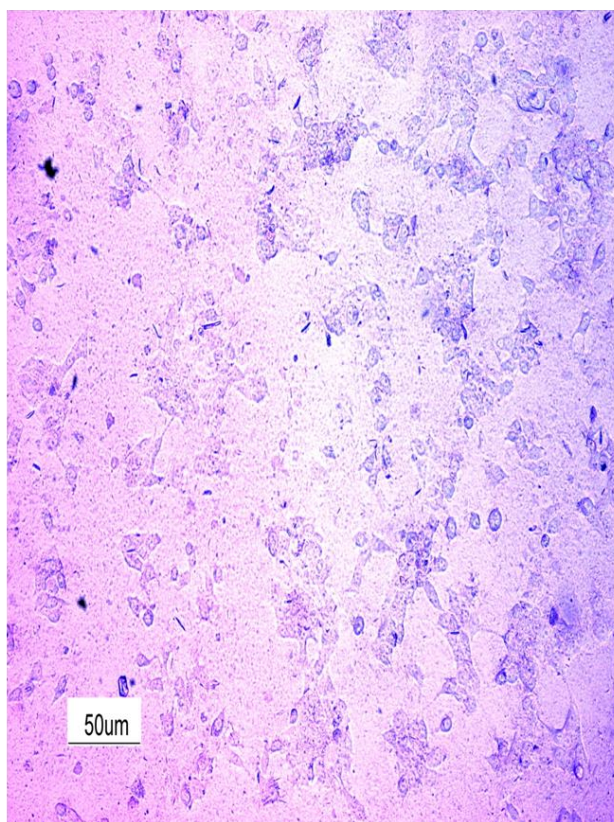

**Figure S-3 F).** Morphological states of MCF-7 cells after incubation (24 h) with corona coated CCGO obtained from thalassemia minor patients (P 5% and P50%).

**Thalassemia Major 5%, MCF-7**

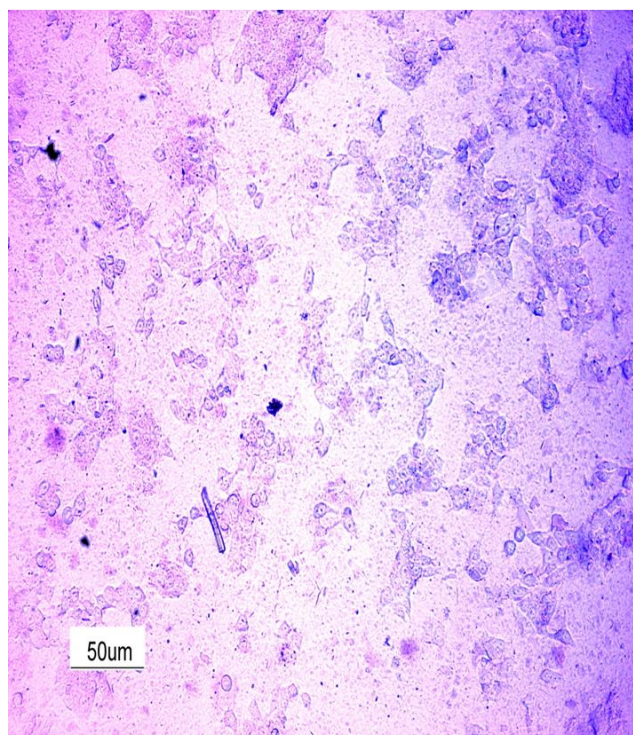

**Thalassemia Major 50%, MCF-7**

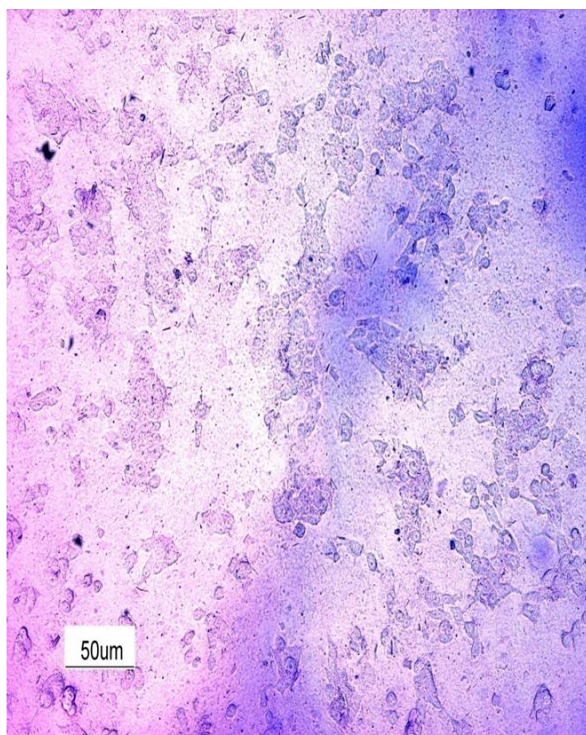

**Figure S-3 G).** Morphological states of MCF-7 cells after incubation (24 h) with corona coated CCGO obtained from thalassemia major patients (P 5% and P50%).



**Fauvism 5%, MCF-7**

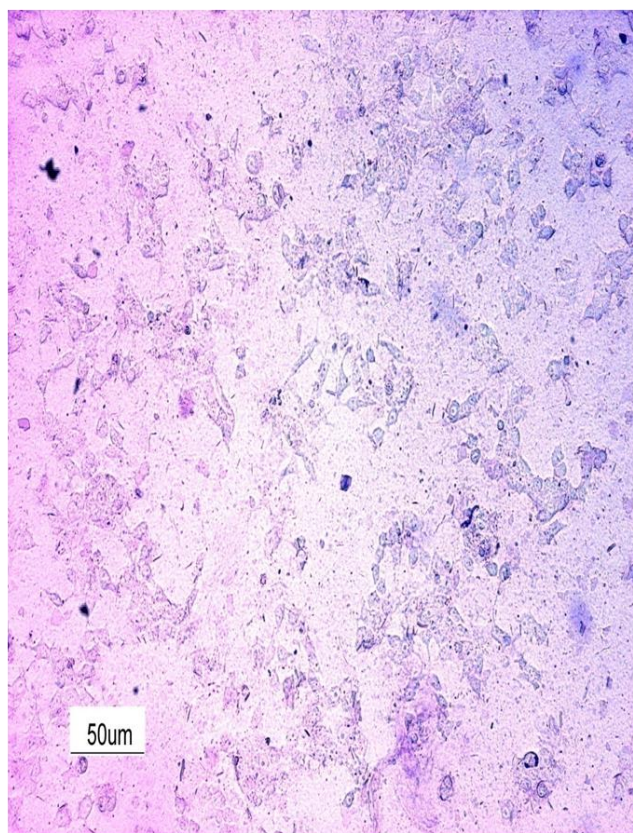

**Fauvism 50%, MCF-7**

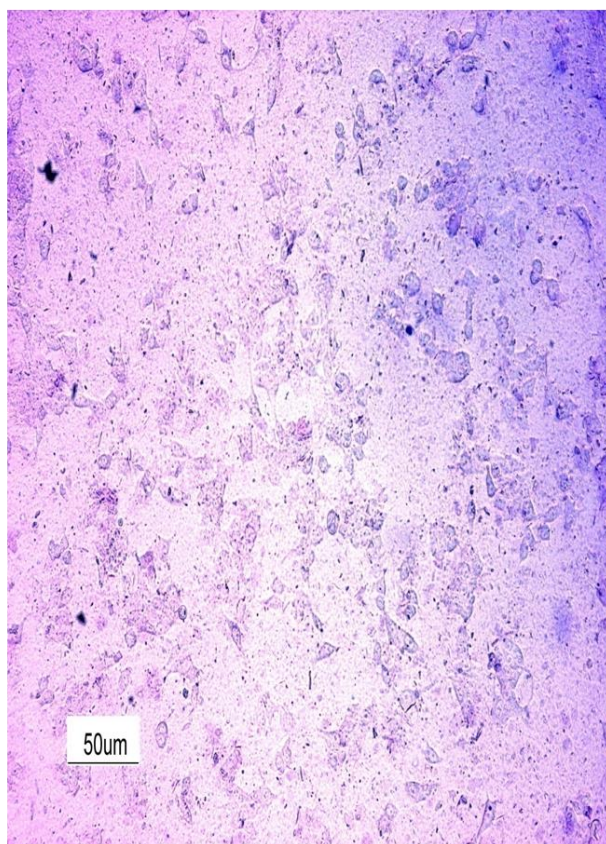

**Figure S-3 H).** Morphological states of MCF-7 cells after incubation (24 h) with corona coated CCGO obtained from fauvism patients (P 5% and P50%).



**Blood cancer 5%, MCF-7**

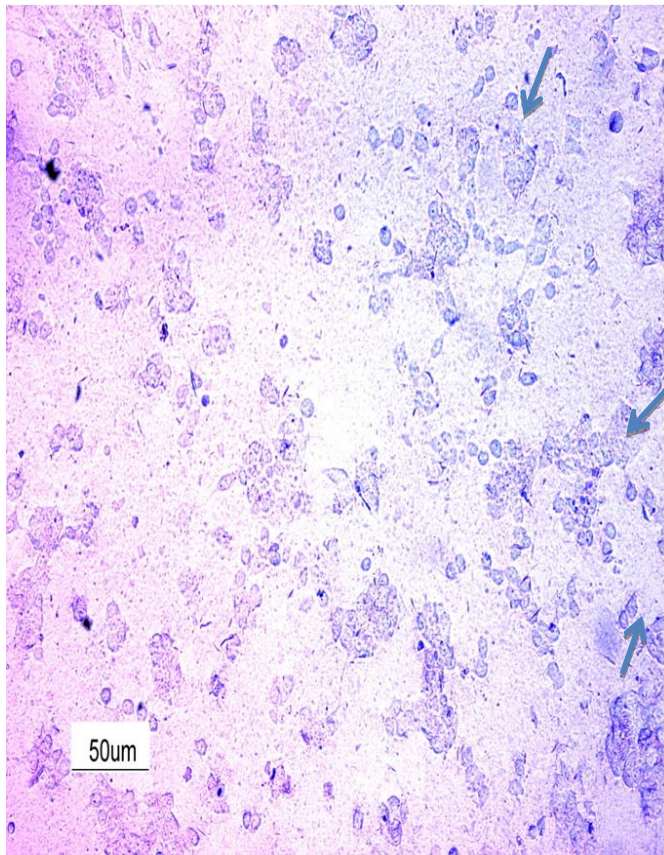

**Blood cancer 50%, MCF-7**

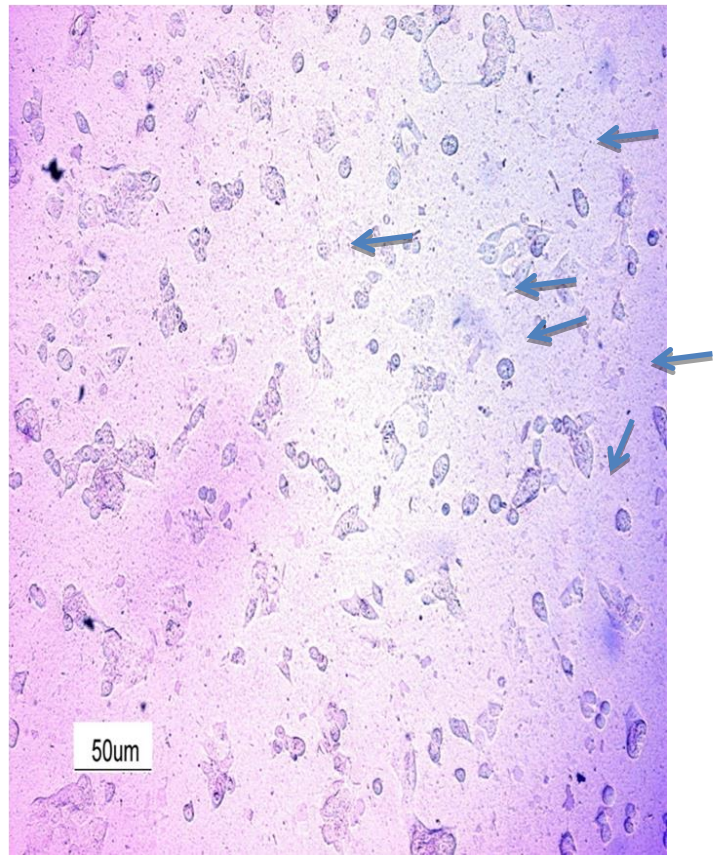

**Figure S-3 I).** Morphological states of MCF-7 cells after incubation (24 h) with corona coated CCGO obtained from blood cancer patients (P 5% and P50%).



**Hypofibrinogen 5%, MCF-7**

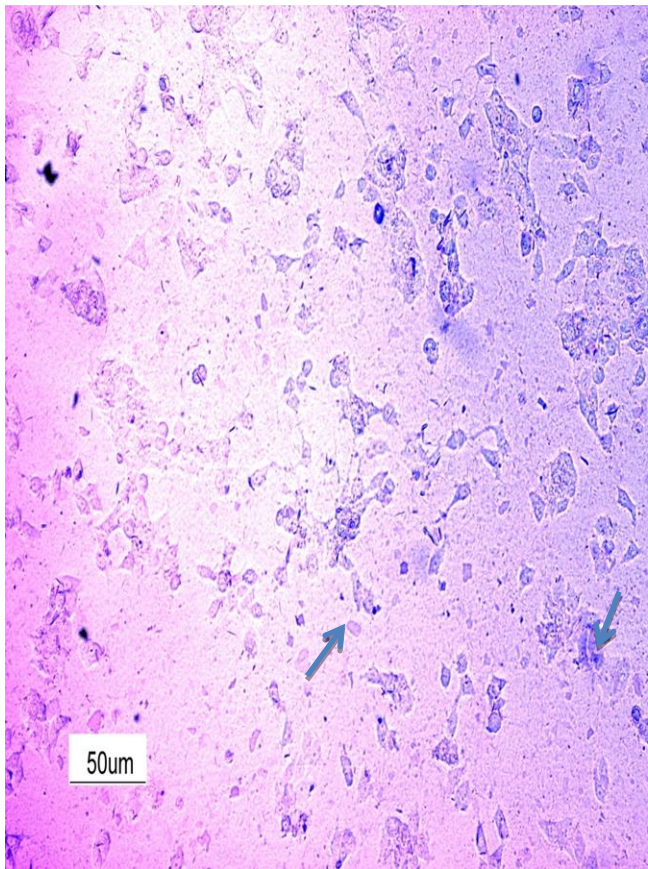

**Hypofibrinogen 50%, MCF-7**

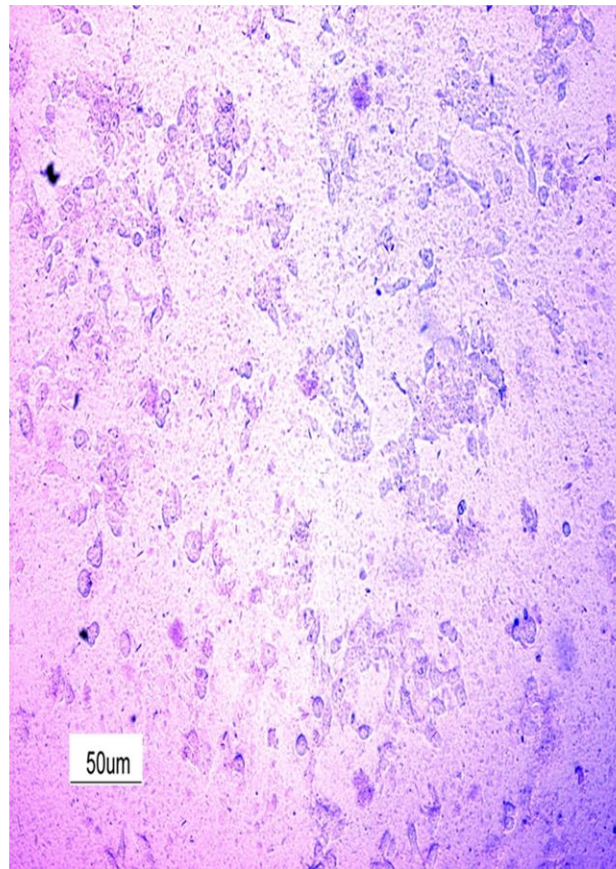

**Figure S3 J).** Morphological states of MCF-7 cells after incubation (24 h) with corona coated CCGO obtained from hypofibrinogenemia patients (P 5% and P50%).

## MCF-7 cell-CONTROL (Nontreated)

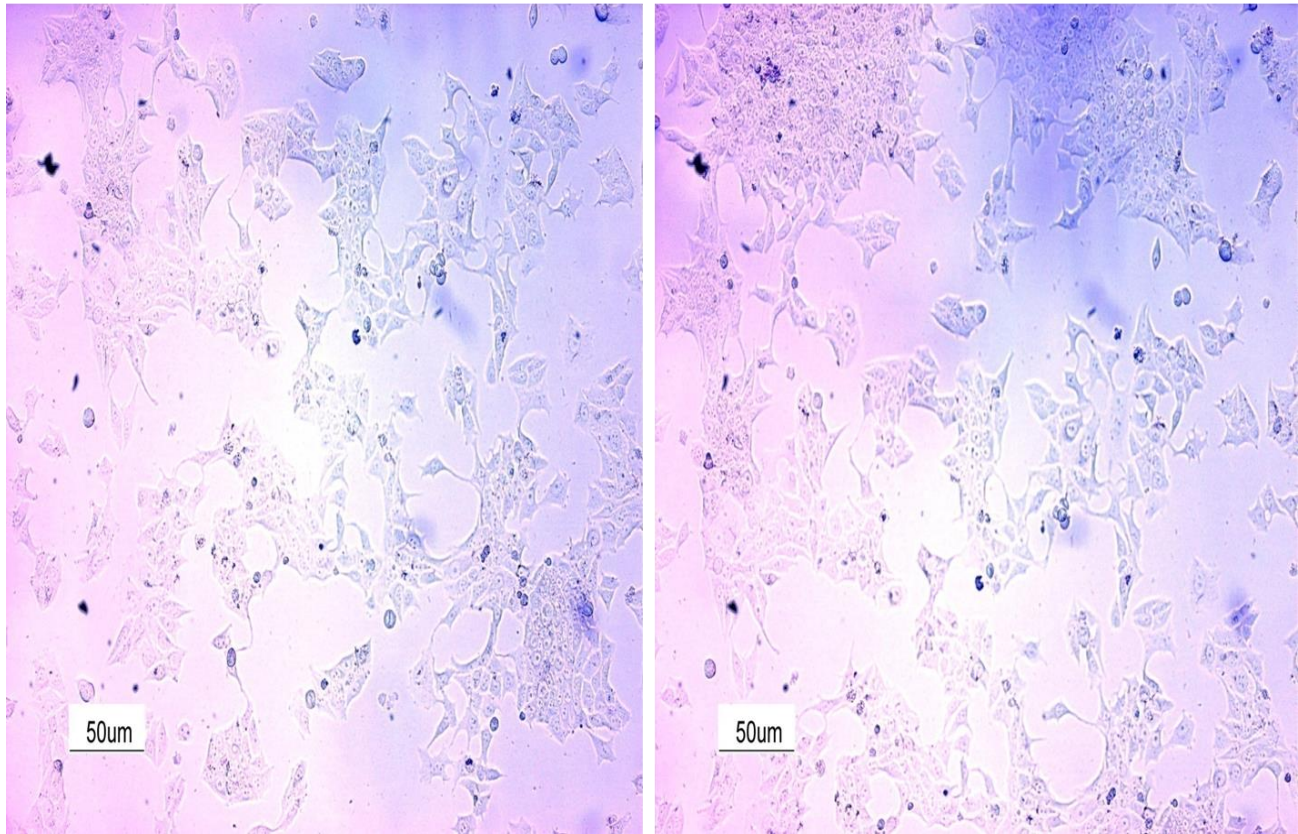

**Figure S3 K).** Morphological states of control MCF-7 cells.



Healthy 5%, MDA-MB 231

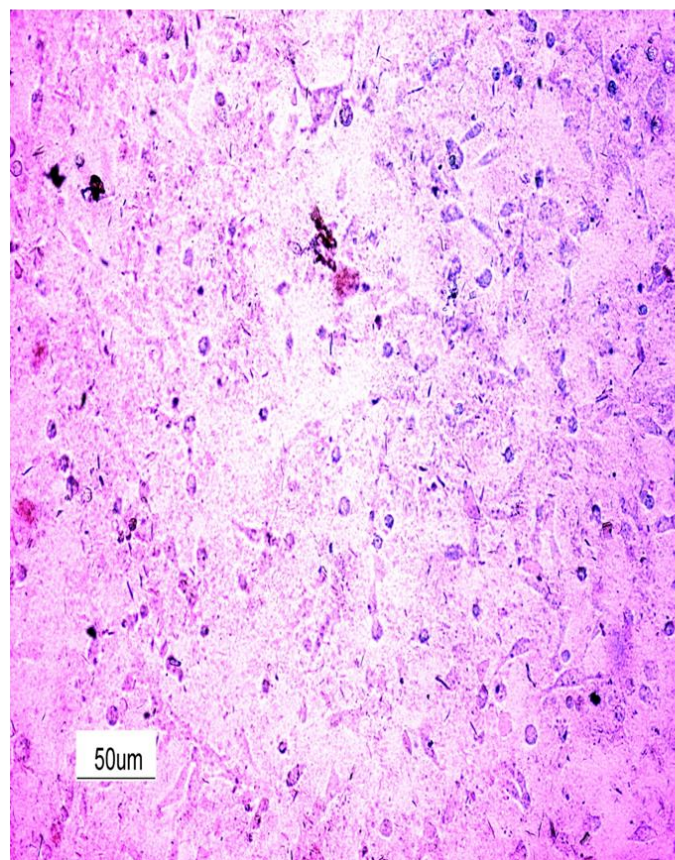

Healthy 50%, MDA-MB 231

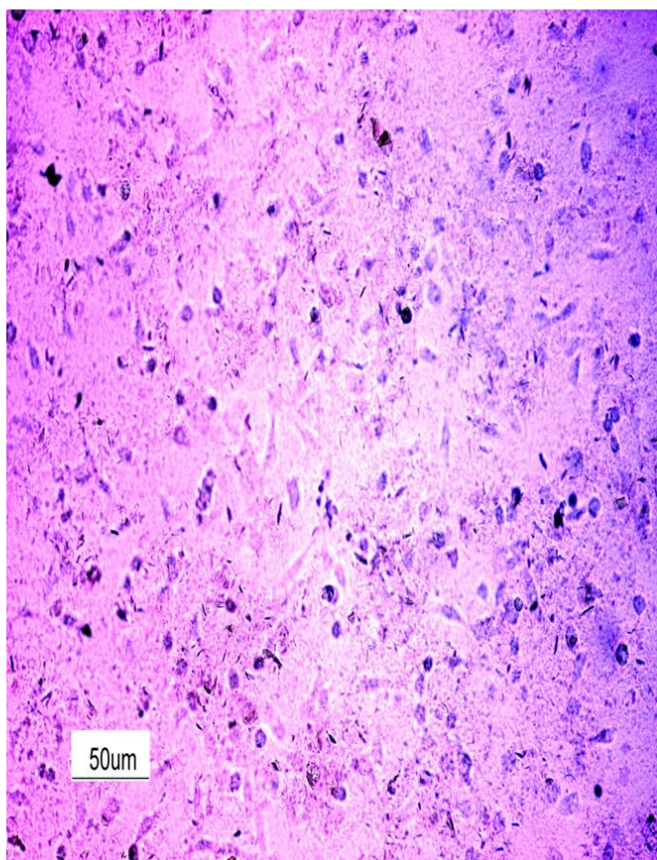

**Figure S4 A).** Morphological states of MDA-MB-231 cells after incubation (24 h) with corona coated CCGO obtained from healthy subjects (P 5% and P50%).



Pregnancy 5%, MDA-MB 231

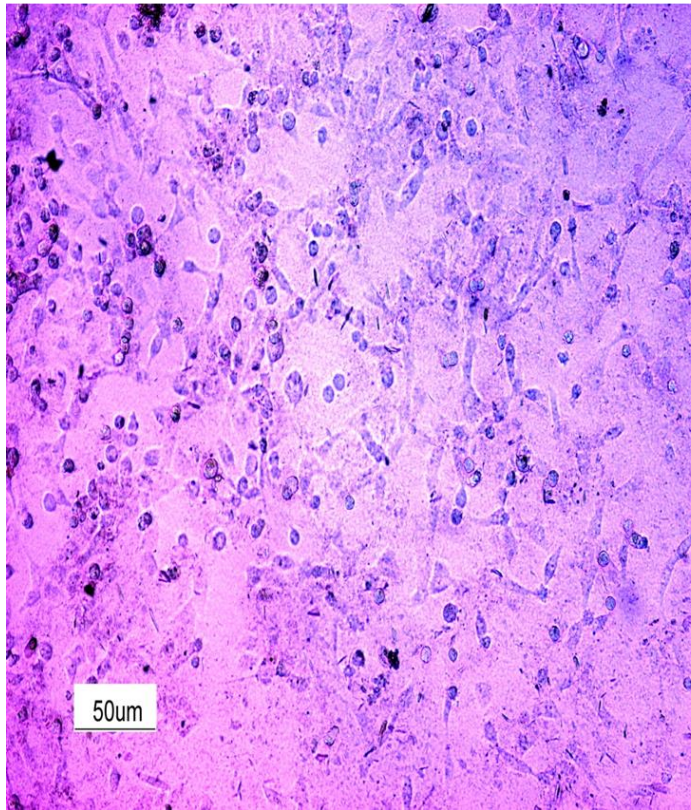

Pregnancy 5%, MDA-MB 231

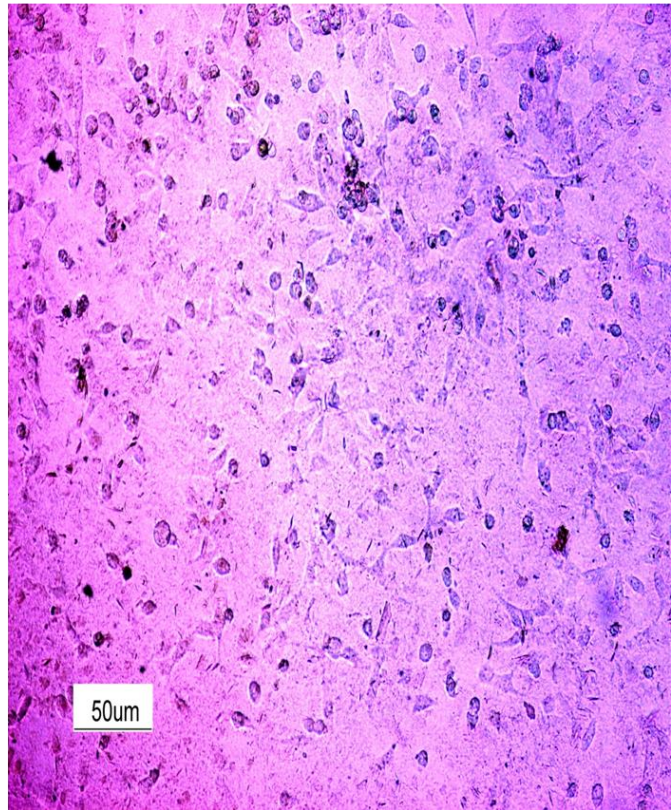

**Figure S4 B).** Morphological states of MDA-MB-231 cells after incubation (24 h) with corona coated CCGO obtained from pregnancy subjects (P 5% and P50%).



Diabetes 5%, MDA-MB 231

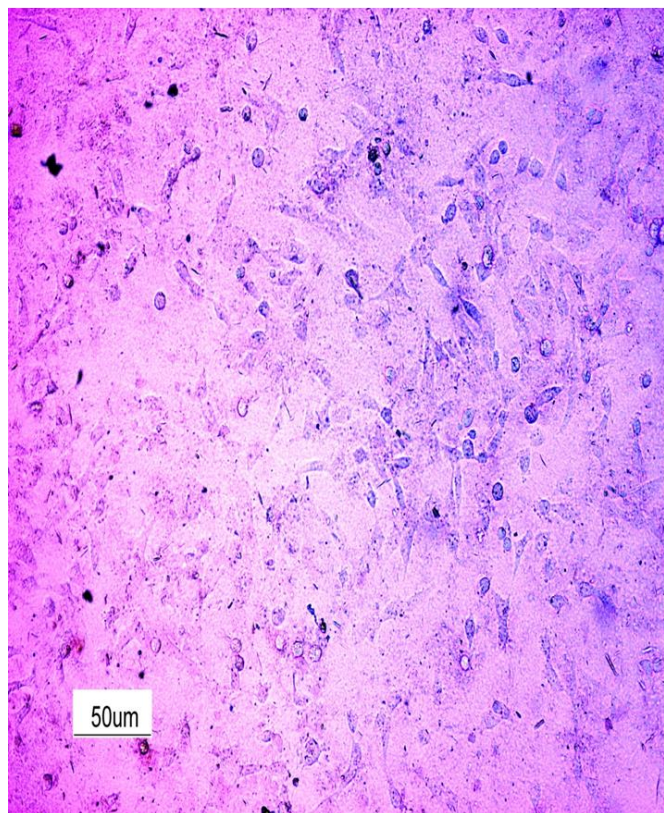

Diabetes 50%, MDA-MB 231

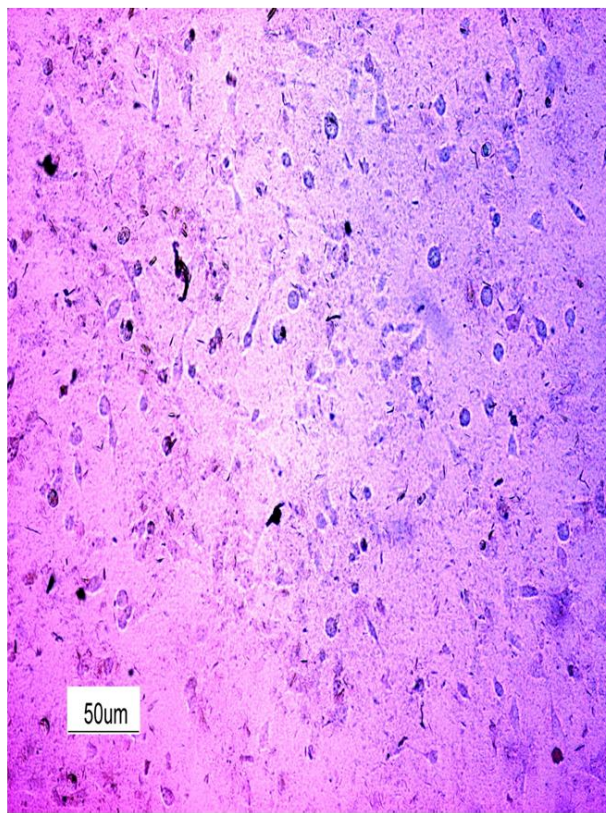

**Figure S4 C).** Morphological states of MDA-MB-231 cells after incubation (24 h) with corona coated CCGO obtained from diabetic patients (P 5% and P50%).



Hypercholesterolemia 5%, MDA-MB 231    Hypercholesterolemia 50%, MDA-MB 231

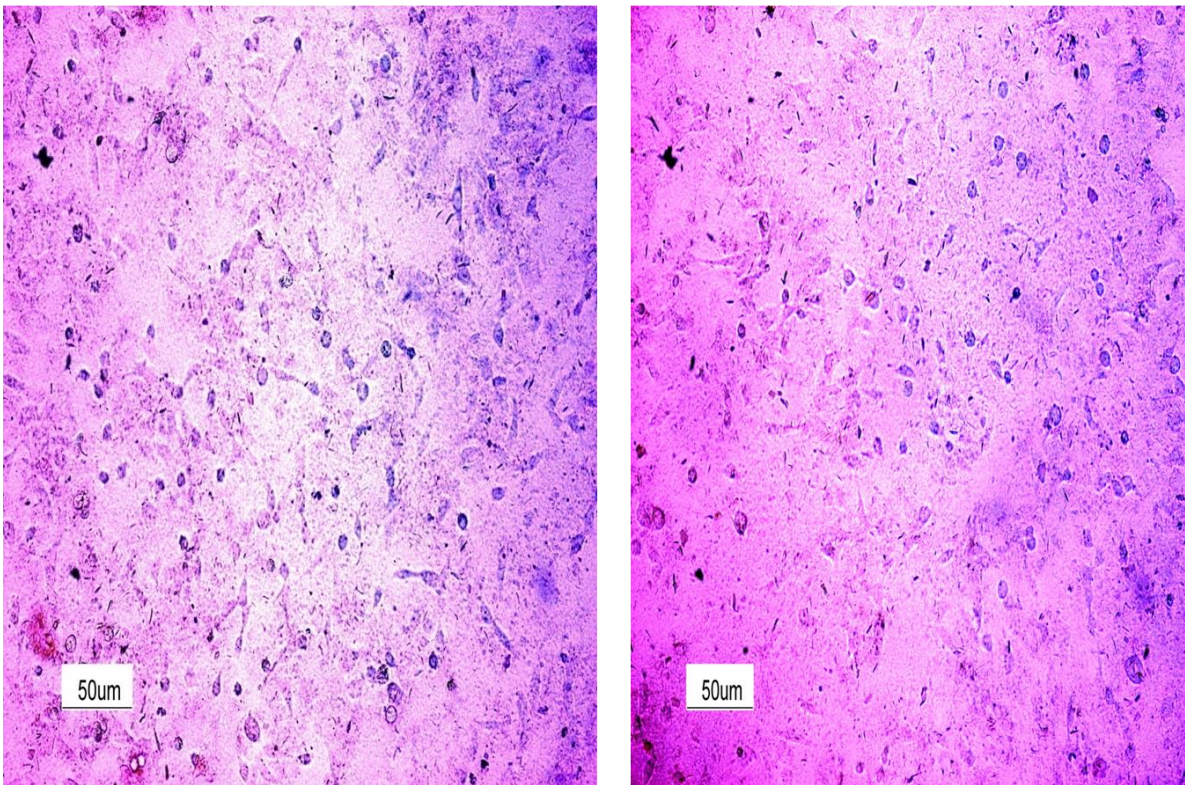

**Figure S4 D).** Morphological states of MDA-MB-231 cells after incubation (24 h) with corona coated CCGO obtained from hypercholesterolemia patients (P 5% and P50%).



Rheumatism 5%, MDA-MB 231

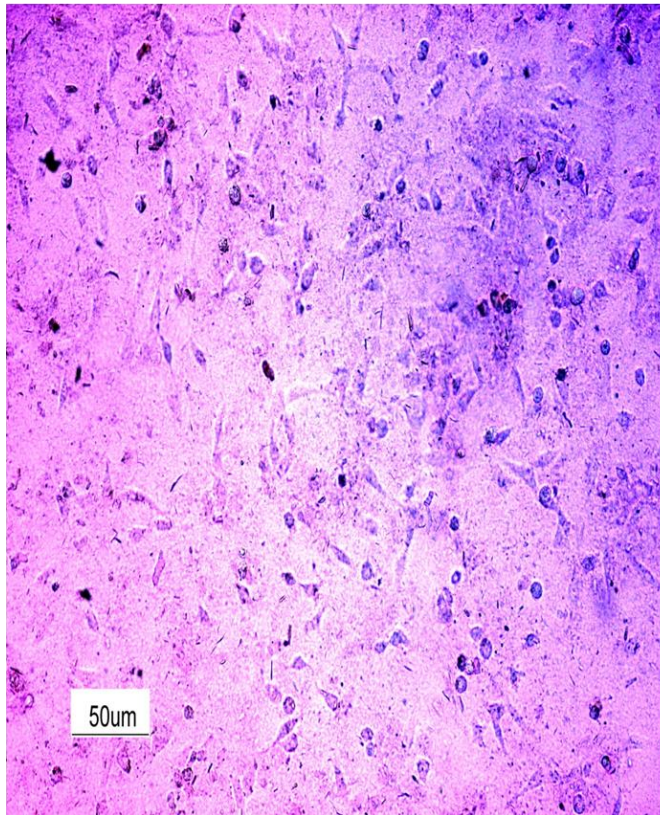

Rheumatism 5%, MDA-MB 231

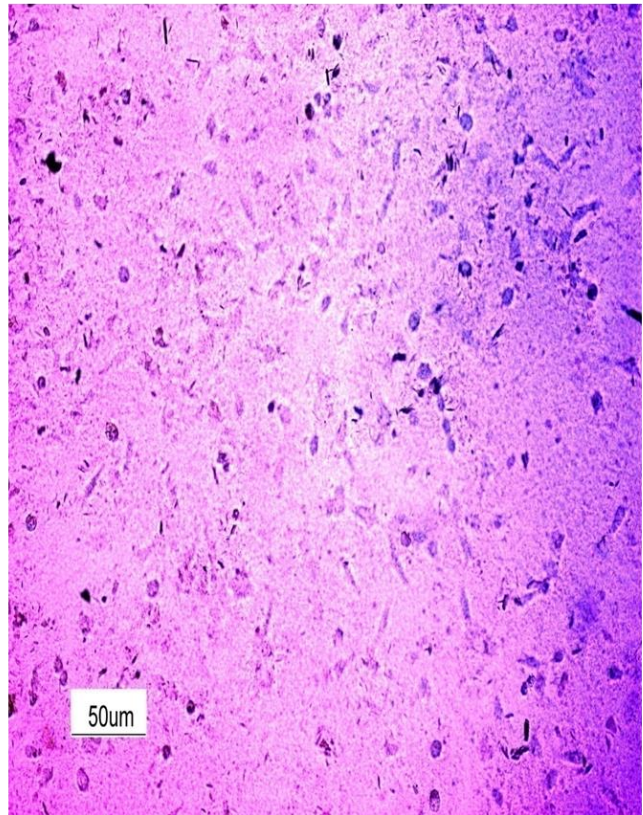

**Figure S4 E).** Morphological states of MDA-MB-231 cells after incubation (24 h) with corona coated CCGO obtained from rheumatism patients (P 5% and P50%).



Thalassemia minor 5%, MDA-MB 231

Thalassemia minor 5%, MDA-MB 231

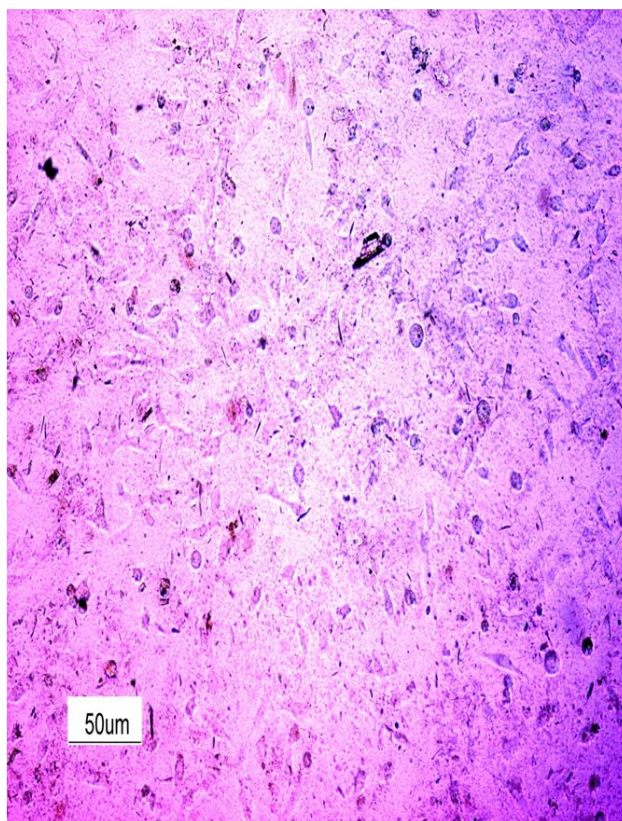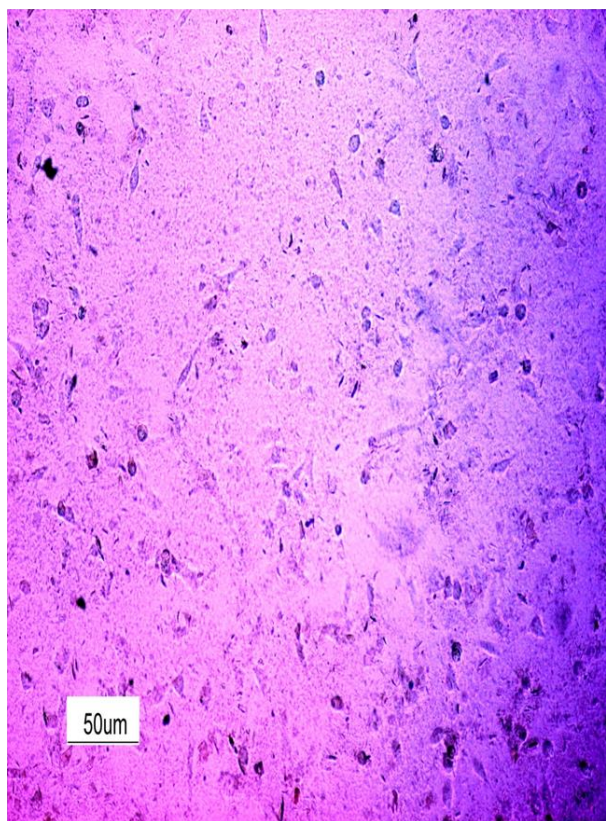

**Figure S4 F).** Morphological states of MDA-MB-231 cells after incubation (24 h) with corona coated CCGO obtained from thalassemia minor patients (P 5% and P50%).



Thalassemia major 5%, MDA-MB 231

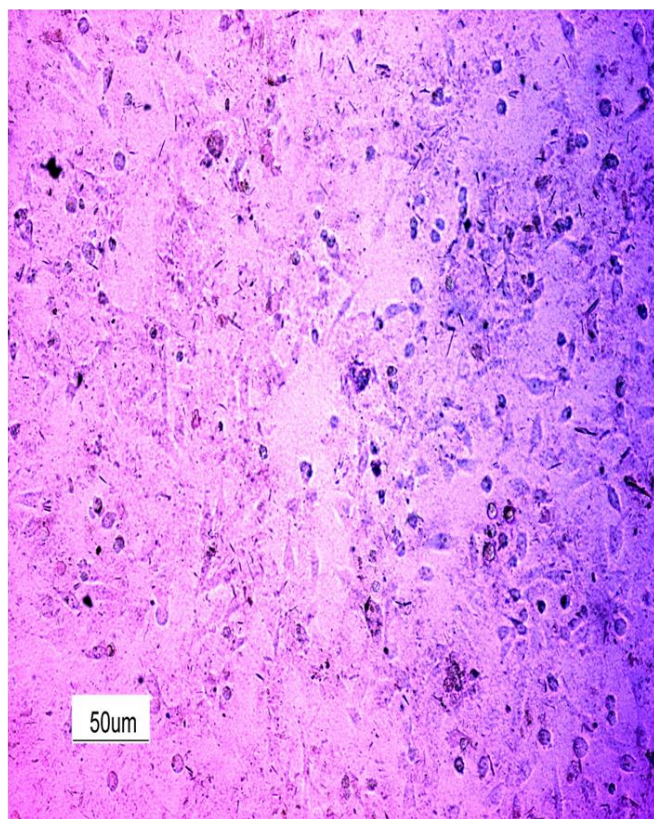

Thalassemia major 50%, MDA-MB 231

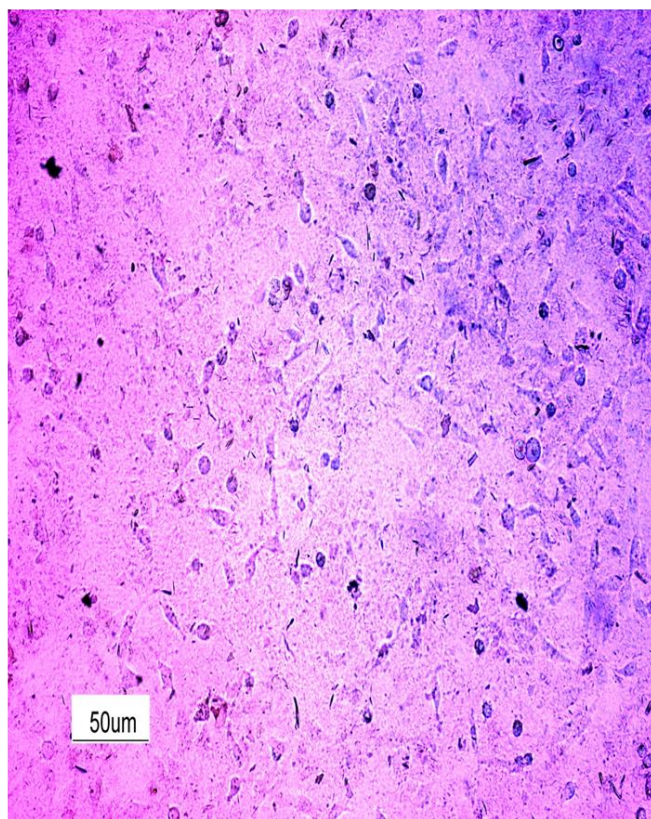

**Figure S4 G).** Morphological states of MDA-MB-231 cells after incubation (24 h) with corona coated CCGO obtained from thalassemia major patients (P 5% and P50%).



Fauvism 5%, MDA-MB 231

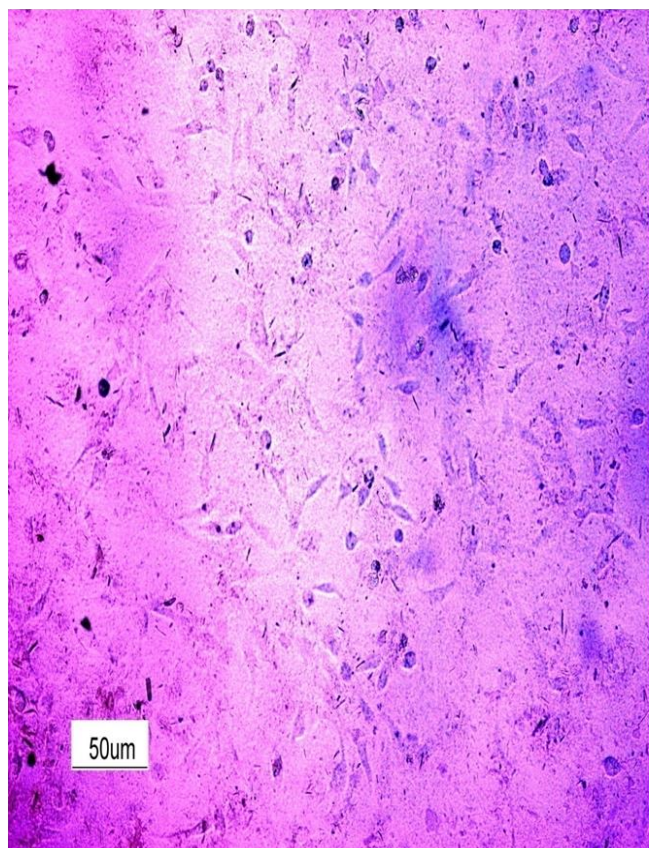

Fauvism 5%, MDA-MB 231

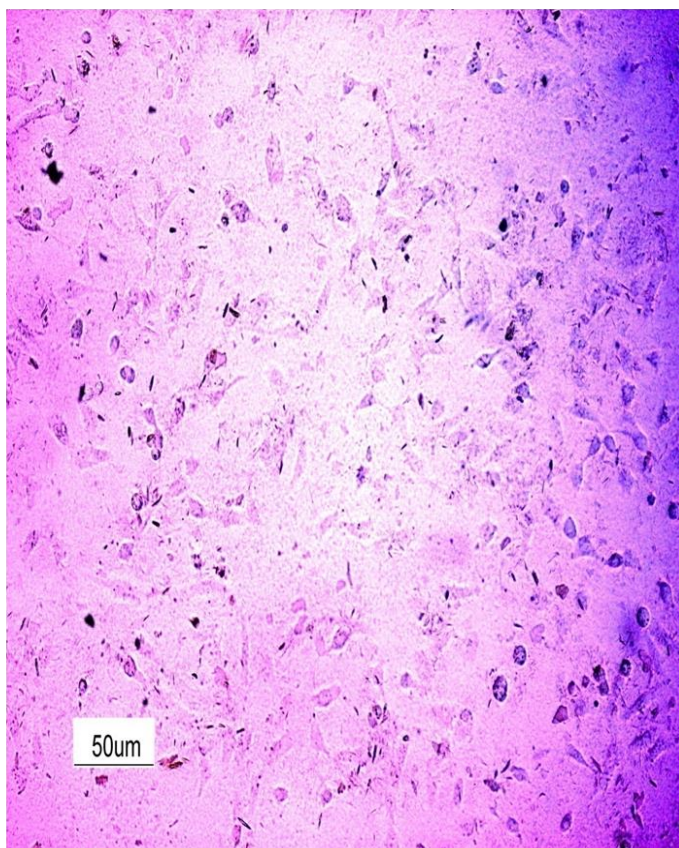

**Figure S4 H).** Morphological states of MDA-MB-231 cells after incubation (24 h) with corona coated CCGO obtained from fauvism patients (P 5% and P50%).



Blood cancer 5%, MDA-MB 231

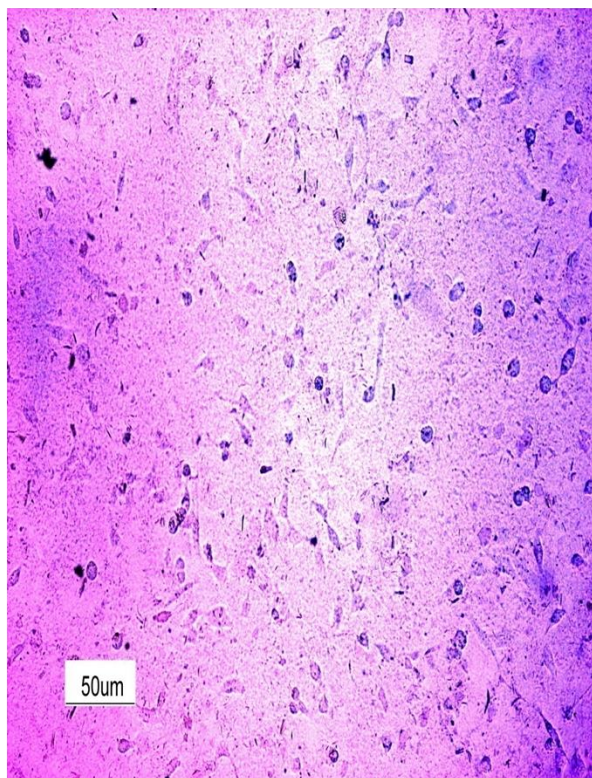

Blood cancer 50%, MDA-MB 231

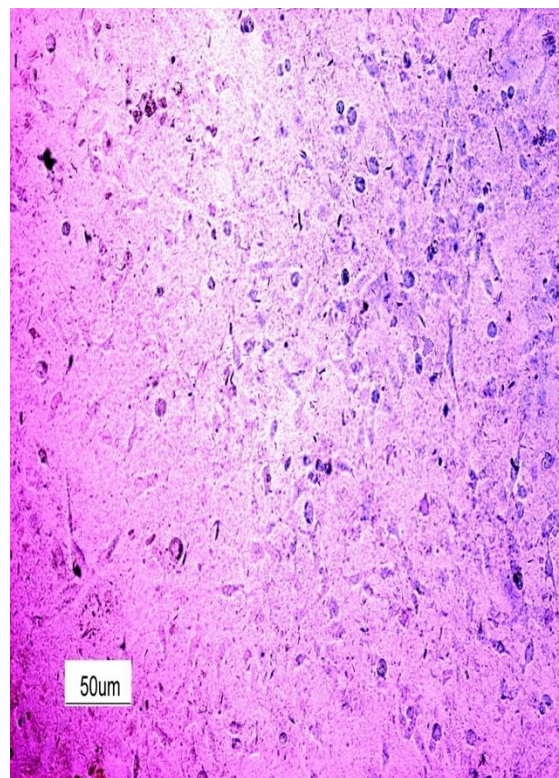

**Figure S4 I).** Morphological sates of MDA-MB-231 cells after incubation (24 h) with corona coated CCGO obtained from blood cancer patients (P 5% and P50%).

Hypofibrinogenemia 5%, MDA-MB 231

Hypofibrinogenemia 5%, MDA-MB 231

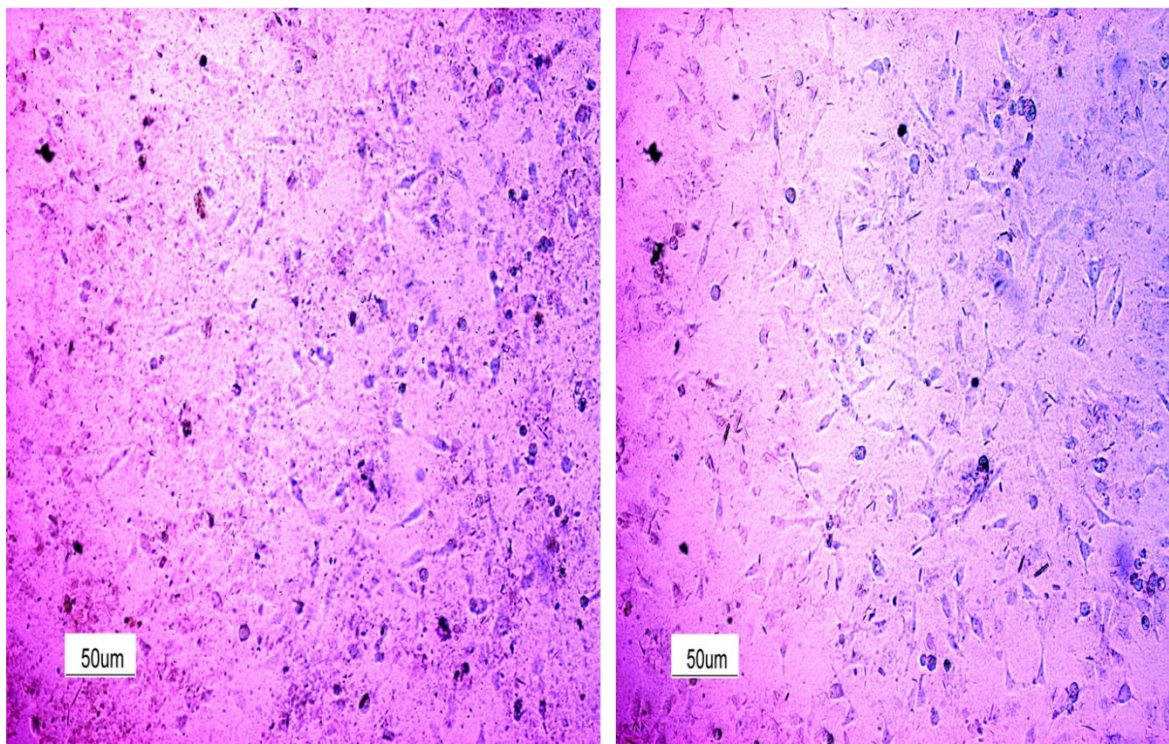

**Figure S4 J).** Morphological states of MDA-MB-231 cells after incubation (24 h) with corona coated CCGO obtained from hypofibrinogenemia patients (P 5% and P50%).



### MDA-MB 231 Control (Nontreated)

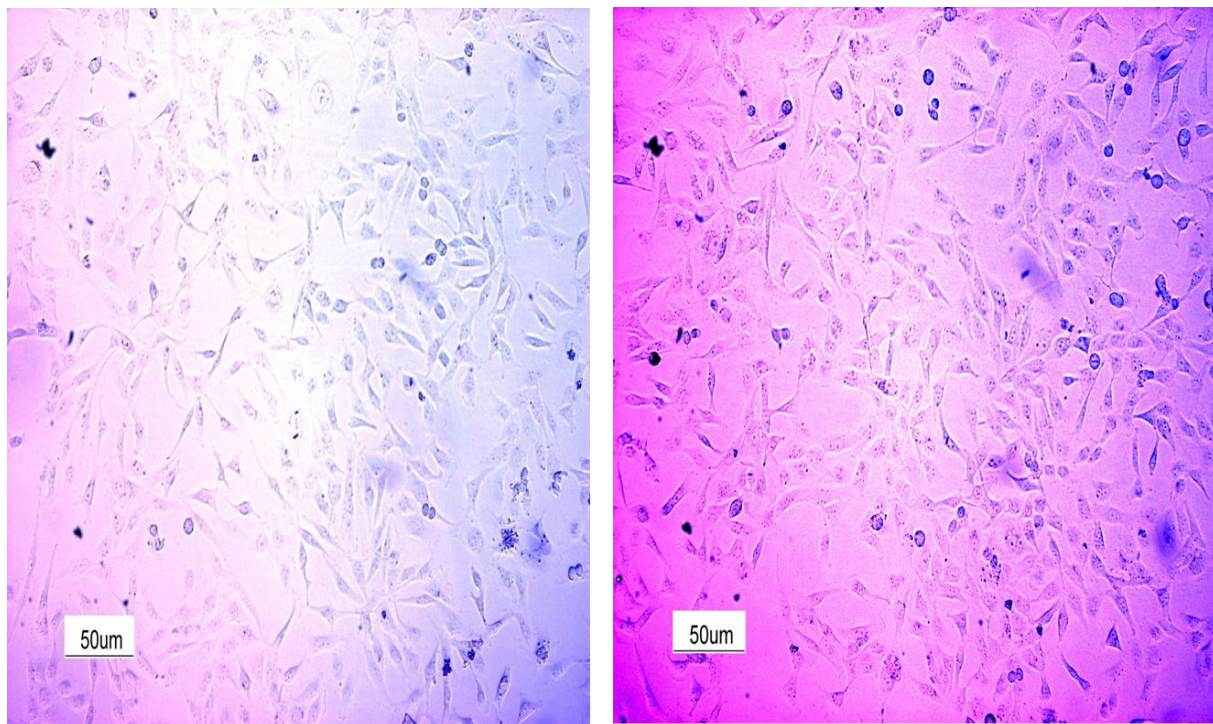

**Figure S4 K).** Morphological sates of control MDA-MB-231 cells.
